# Supplementary material for: An ICT-guided ratiometric naphthalene–benzothiazole-based probe for the detection of cyanide with real-time applications in human breast cancer cells
Source: Royal Society of Chemistry journal article supplement (doi:10.1039/d2ay00898j), 2022-01-01
Supplement: d2ay00898j1.pdf [file d2ay00898j1.pdf]

## **An ICT guided ratiometric naphthalene-benzothiazole based probe for detection of cyanide with real time application in human breast cancer cell**

Shilpita Banerjee<sup>a</sup>, Moumi Mandal<sup>a</sup>, Satyajit Halder<sup>b</sup>, Anirban Karak<sup>a</sup>, Dipanjan Banik<sup>a</sup>, Kuladip Jana<sup>b</sup>, Ajit Kumar Mahapatra<sup>a\*</sup>

*<sup>a</sup>Department of Chemistry, Indian Institute of Engineering Science and Technology, Shibpur, Howrah 711 103, India*

*<sup>b</sup>Division of Molecular Medicine, Bose Institute, P 1/12, CIT Scheme VIIM, Kolkata-700 054, India.*

\*Author to whom correspondence should be addressed; electronic mail: [akmahapatra@chem.iiests.ac.in](mailto:akmahapatra@chem.iiests.ac.in); Tel.: +91 – 9434508013

\*Corresponding author. Fax: +91 33 26684564; Tel: +91 33 2668 4561;

E-mail: [mahapatra574@gmail.com](mailto:mahapatra574@gmail.com) (A. K. Mahapatra)

## Table of Contents

| <b>Description</b>                                            | <b>Page</b> |
|---------------------------------------------------------------|-------------|
| 1. Comparison table of previously reported cyanide sensors    | 3           |
| 2. Solid state cyanide sensing                                | 4           |
| 3. Computational method                                       | 4           |
| 4. Live cell imaging study                                    | 5           |
| 5. Calculation of LOD                                         | 6           |
| 6. pH effect, application of the probe in tap and river water | 7           |
| 7. Calculation of first order rate constant                   | 8           |
| 8. Emission spectra of probe                                  | 9           |
| 9. Job's plot                                                 | 9           |
| 10. Determination of Binding constant                         | 10          |
| 11. NMR spectra of aldehyde, probe and product                | 10-11       |
| 12. Mass spectra of probe and product                         | 12          |

**1. Table S1 Comparison between previously reported CN<sup>-</sup> sensors (based upon benzothiazole acetonitrile) with the current work**

| Sl. No. | Probe structure                                                                     | Solvent      | Sensor type             | LOD                                                                                                | Application               | Reference                                            |
|---------|-------------------------------------------------------------------------------------|--------------|-------------------------|----------------------------------------------------------------------------------------------------|---------------------------|------------------------------------------------------|
| 1.      | 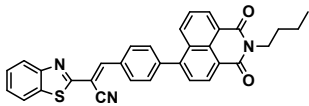   | THF          | Turn on (AIE)           | $3.35 \times 10^{-5} \text{M}$                                                                     | -                         | Choi et al., Spec acta A, 2021, 252, 119535          |
| 2.      |    | DMSO         | Turn on                 | 3.73nM                                                                                             | -                         | Mondal et al., J of Luminescence, 2018, 201, 419-426 |
| 3.      |  | Acetonitrile | Turn off                | 9.44ppm                                                                                            | Test strips               | Qu et al., Sens & act B, 2017, 241, 1043-1049        |
| 4.      |  | Acetonitrile | Ratiometric and turn on | $5.52 \times 10^{-8} \text{M}$<br>$2.35 \times 10^{-8} \text{M}$<br>$9.26 \times 10^{-8} \text{M}$ | -                         | Chellappa et al., Sens & act B, 2017, 242, 434-442   |
| 5.      |  | Acetonitrile | Turn on                 | $4.23 \times 10^{-8} \text{M}$                                                                     | -                         | Nagamani et al., SN app sc, 2020, 2, 1069            |
| 6.      |                                                                                     | DMSO         | Ratiometric             | 1 ppb                                                                                              | Sample water, test strips | Kumar et al., J of Mol Structure, 2022, 1250,        |

|    |                                                                                   |      |             |                               |                                          |           |
|----|-----------------------------------------------------------------------------------|------|-------------|-------------------------------|------------------------------------------|-----------|
|    | 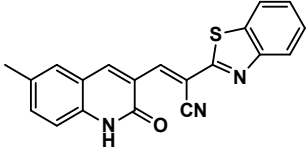 |      |             |                               |                                          | 131677    |
| 7. |  | DMSO | Ratiometric | $2.1 \times 10^{-8} \text{M}$ | Environmental water samples, Test strips | This work |

## 2. Solid state $\text{CN}^-$ sensing:

Small piece of TLC sticks were dipped into  $1 \times 10^{-5} \text{M}$  probe solution followed by drying in open air. The sticks were further dipped into two different concentrated solutions of  $\text{CN}^-$  ( $1 \mu\text{M}$ ,  $2 \mu\text{M}$ ) and dried for 5 minutes. After that photographs were taken to examine the sensing behaviour of the probe MNBTZ.

## 3. Computational method:

### Theoretical calculations:

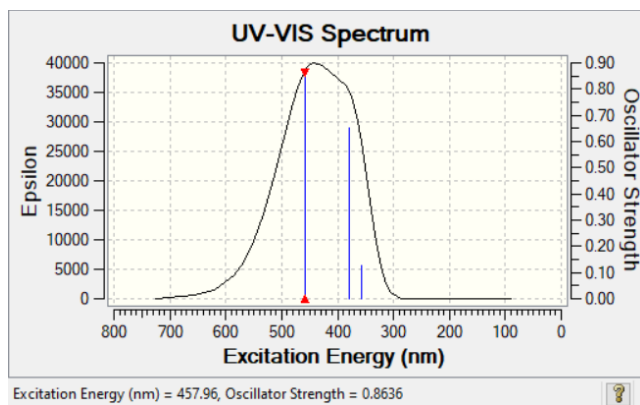

**Figure S1.** Absorption spectra of the Probe (MNBTZ)

**Table S2**The vertical main orbital transition of the **MNBTZ** calculated by TDDFT method

| Energy(eV) | Wavelength (nm) | Osc. strength(f) | Transition         |
|------------|-----------------|------------------|--------------------|
| 2.7073     | 457.96          | 0.8636           | <b>HOMO→LUMO</b>   |
| 3.6081     | 379.05          | 0.6493           | <b>HOMO-1→LUMO</b> |
| 3.4677     | 357.54          | 0.1274           | <b>HOMO-2→LUMO</b> |

#### 4. Live cell imaging study:

##### Cytotoxicity assay:

MTT cell proliferation assay was performed to assess the cytotoxic effect of the ligand **MNBTZ** in both the cancer cell line MDA-MB-231 and normal cell line NKE. In brief, cells were first seeded in 96-well plates at a concentration of  $1 \times 10^4$  cells per well for 24 h and exposed to the different working concentration of ligand **MNBTZ** in DMSO and water ratio of 1:1(0  $\mu$ M, 10  $\mu$ M, 20  $\mu$ M, 40  $\mu$ M, 80  $\mu$ M, 100 Mm) for 24 hrs. After incubation cells were washed with 1 $\times$ PBS and MTT solution (0.5 mg/ml) were added to each well and incubated for 4 hour and the resulting formazan crystals were dissolved in DMSO and the absorbance was measured at 570 nm by using a microplate reader. Cell viability was expressed as a percentage of the control experimental setup.

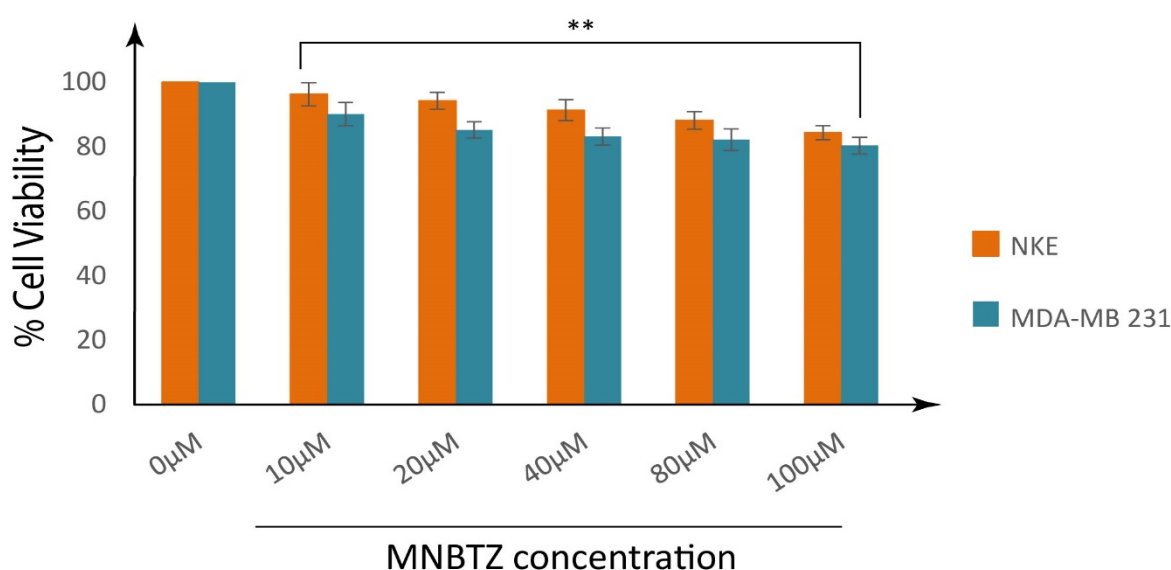

**Figure S2.** Cell survivability of MDA-MB 231 and NKE cells exposed to different ligand **MNBTZ** concentration. Data are representative of at least three independent experiments and bar graph shows mean  $\pm$  SEM,  $**p < 0.001$  were interpreted as statistically significant, as compared with the control.

### 5. Calculation of Limit of detection:

From the plot of fluorescence intensity ratio  $I_{435}/I_{567}$  vs concentration of  $CN^-$  limit of detection was calculated by using the formula  $LOD = k \times \delta / m$  where  $k = 3$ ,  $\delta$  is the standard deviation of the blank solution and  $m$  is the slope of the calibration curve.

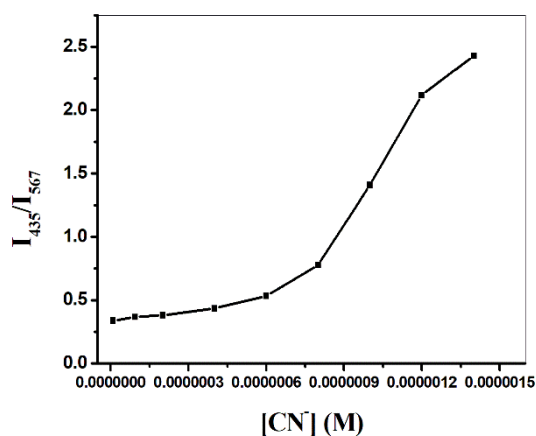

**Figure S3.** Plot of fluorescence intensity ratio vs concentration of  $CN^-$

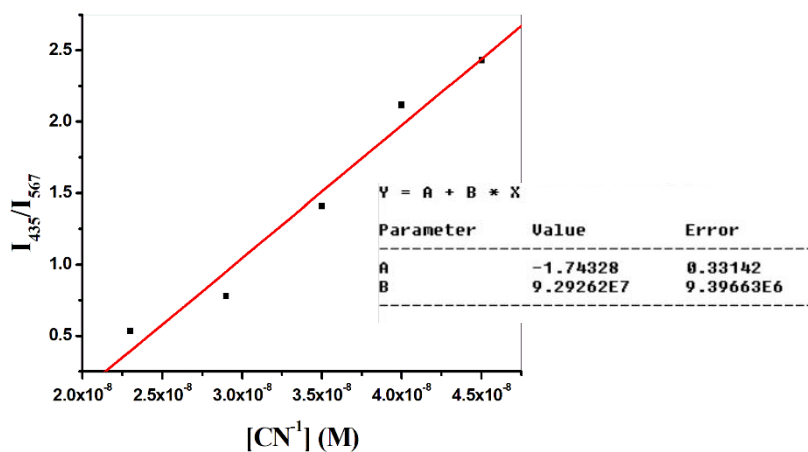

**Figure S4.** Calibration of the probe at an intensity ratio  $I_{435}/I_{567}$  depending on  $\text{CN}^-$  concentration.

LOD=  $2.1 \times 10^{-8}$  (M) ( $R^2=0.98501$ )

**6.pH effect:**

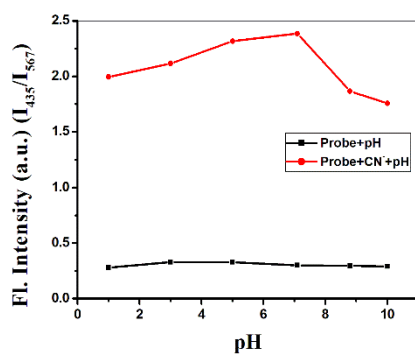

**Figure S5.** Effect of pH on fluorescence of MNBTZ and MNBTZ+ $\text{CN}^-$  in DMSO/ $\text{H}_2\text{O}$  at 380nm

**7. Application of the probe in tap water and river water:**

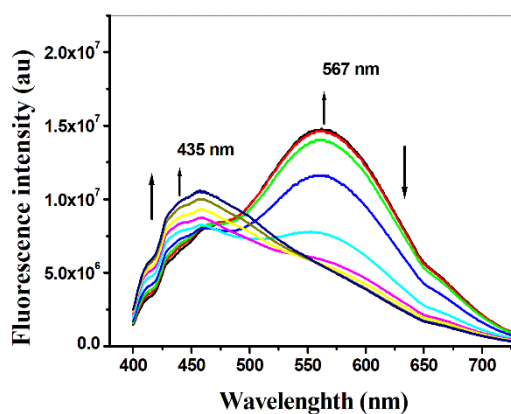

**Figure S6:** Fluorescence intensity changes of MNBTZ ( $1 \times 10^{-5} \text{M}$ ) upon gradual addition of TBACN in **DMSO-tap water** ( $10 \mu\text{M}$  HEPES buffer, 1:1 v/v, pH 7.4 at  $25^\circ\text{C}$ ) ( $\lambda_{\text{ex}}=380\text{nm}$ ,  $\lambda_{\text{em}}=400\text{nm}$ )

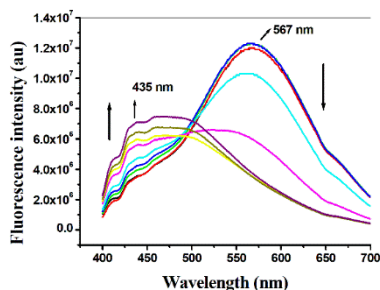

**Figure S7:** Fluorescence intensity changes of MNBTZ ( $1 \times 10^{-5} \text{M}$ ) upon gradual addition of TBACN in **DMSO-river water** ( $10 \mu\text{M}$  HEPES buffer, 1:1 v/v, pH 7.4 at  $25^\circ\text{C}$ ) ( $\lambda_{\text{ex}}=380\text{nm}$ ,  $\lambda_{\text{em}}=400\text{nm}$ )

**Table S3: Real sample study for MNBTZ**

| Samples     | Spiked( $\mu\text{M}$ ) | Found ( $\mu\text{M}$ ) | Actual concentration of CN <sup>-</sup> in sample water (mg/L) |
|-------------|-------------------------|-------------------------|----------------------------------------------------------------|
| Tap water   | 30                      | 30.216                  | 0.09                                                           |
| River water | 30                      | 30.448                  | 0.187                                                          |

## 8. Calculation of first order rate constant ( $k'$ )

First order rate constant was calculated by the following equation:

$$\ln[(F_{\text{max}} - F_t)/F_{\text{max}}] = -k't$$

Where  $F_t$  and  $F_{\text{max}}$  symbolize the fluorescence intensities at 435nm at time  $t$  and maximum value obtained upon completion of the reaction and  $k'$  is the monitored first order rate constant.

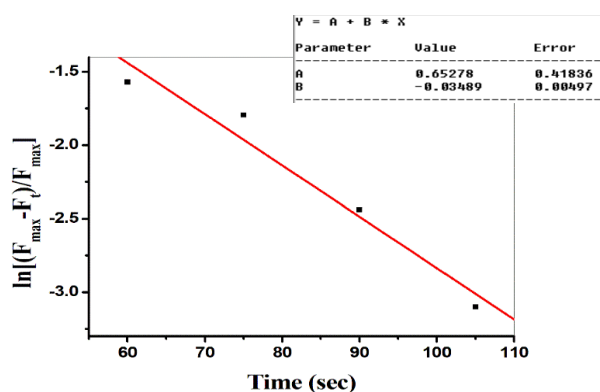



**Figure S8.** First order kinetic plot of probe ( $1 \times 10^{-5} \text{M}$ ) in the presence of 2 equivalent of  $1 \times 10^{-4} \text{M}$   $\text{CN}^-$  solution ( $\lambda_{\text{ex}}=380 \text{nm}$ ,  $\lambda_{\text{em}}=400 \text{nm}$ )

First order rate constant  $k' = 0.0348 \text{ s}^{-1}$

### 9. Emission spectra of probe

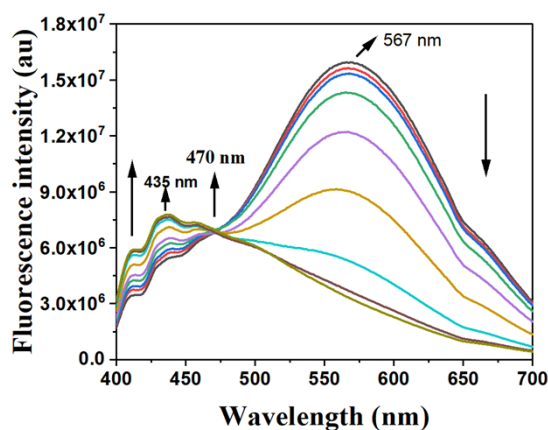

**Figure S9.** Fluorescence intensity changes of MNBTZ ( $1 \times 10^{-5} \text{M}$ ) upon gradual addition of TBACN in **DMSO-distilled water** ( $10 \mu\text{M}$  HEPES buffer, 1:1 v/v, pH 7.4 at  $25^\circ\text{C}$ ) ( $\lambda_{\text{ex}}=380 \text{nm}$ ,  $\lambda_{\text{em}}=400 \text{nm}$ )

### 10. Job's plot of the probe MNBTZ for $\text{CN}^-$

Job's plots were drawn by plotting  $\Delta F \cdot X(\text{host})$  vs  $X(\text{host})$  ( $\Delta F$  = change of intensity ratio of the emission spectrum [ $I_{435}/I_{567}$ ] for MNBTZ during titration and  $X(\text{host})$  is the mole fraction of the host in each case respectively).

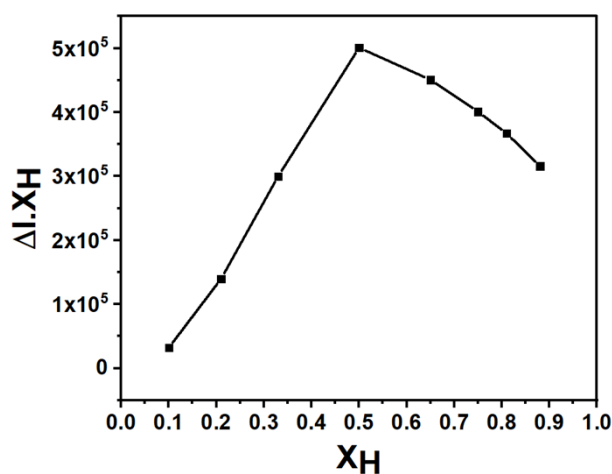

Figure S10. Job's plot of MNBTZ with  $\text{CN}^-$  using fluorescence data

### 11. Determination of binding constant value ( $K_a$ ) using linear method for MNBTZ

Binding constant value ( $K_a$ ) was calculated by plotting  $1/\Delta I$  vs  $1/[G]$  [ ( $\Delta I$  = change of intensity ratio of the emission spectrum [ $I_{435}/I_{567}$ ] for MNBTZ during titration and  $[G]$  is the concentration of  $\text{CN}^-$  in each case respectively).

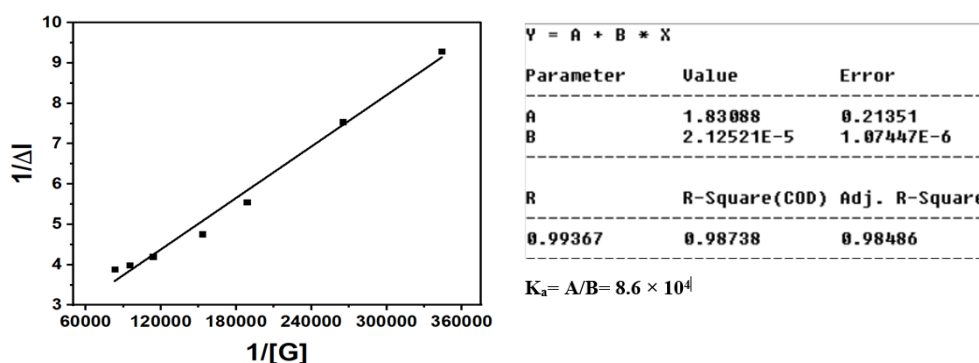

Figure S11. Binding constant value of MNBTZ with  $\text{CN}^-$  using fluorescence data

### 12. NMR spectra: $^1\text{H}$ -NMR, $^{13}\text{C}$ -NMR

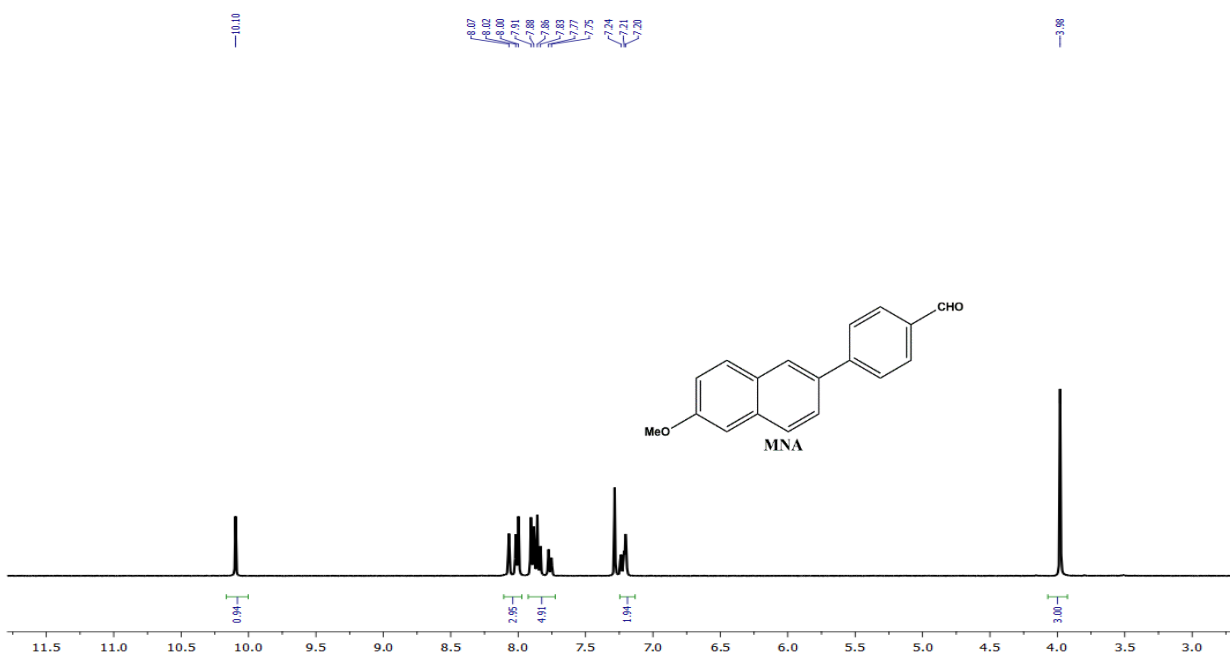

Figure S12:  $^1\text{H}$ -NMR spectra of MNA in  $\text{CDCl}_3$

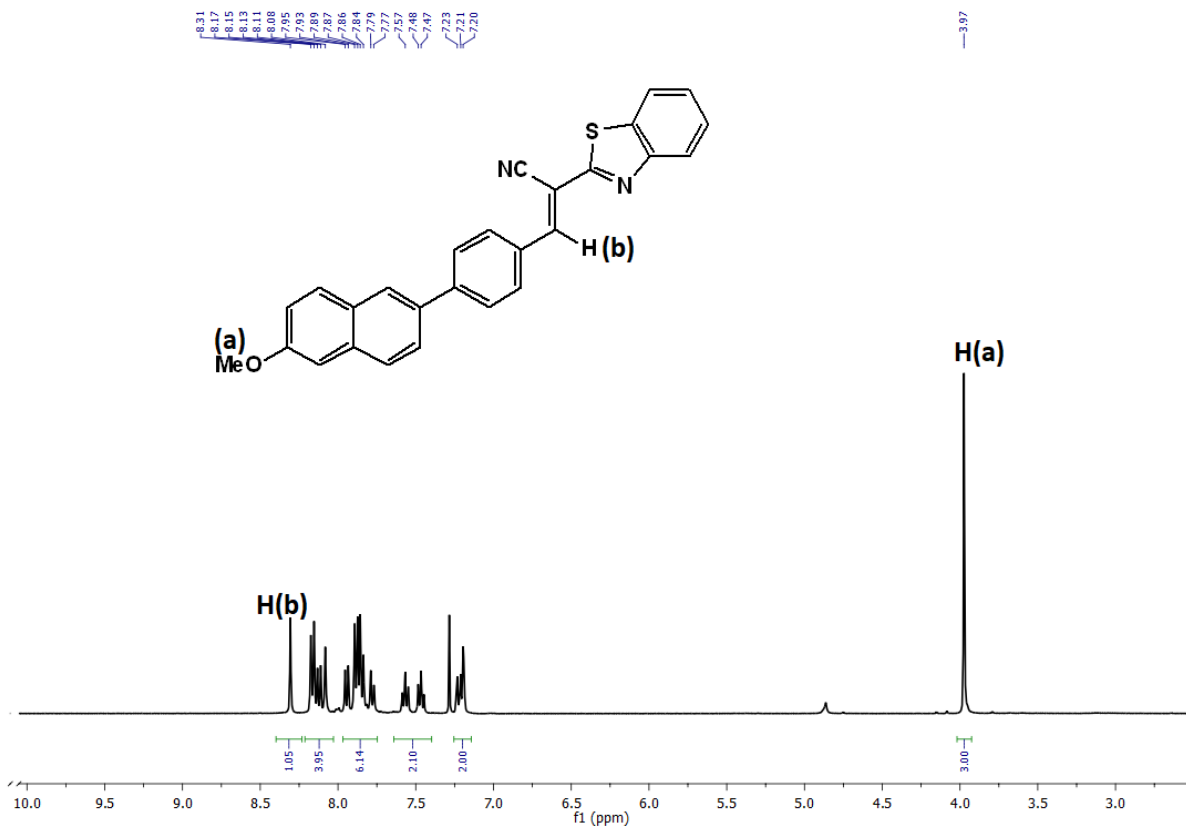

Figure S13:  $^1\text{H-NMR}$  spectra of MNBTZ in  $\text{CDCl}_3$

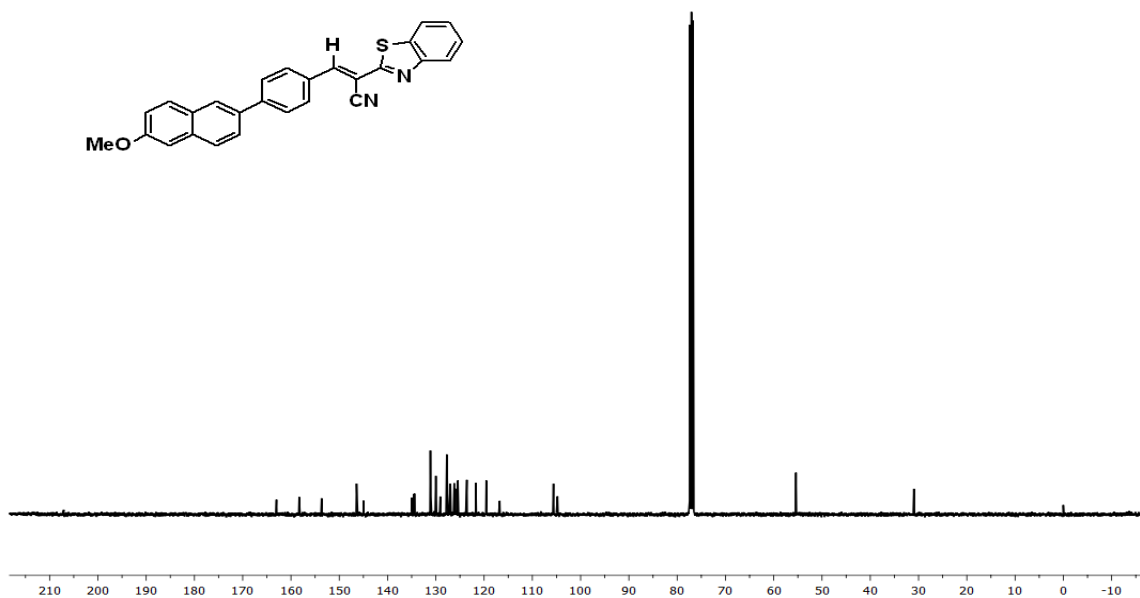

Figure S14:  $^{13}\text{C-NMR}$  spectra of MNBTZ in  $\text{CDCl}_3$

### 13. ESI-MS spectra

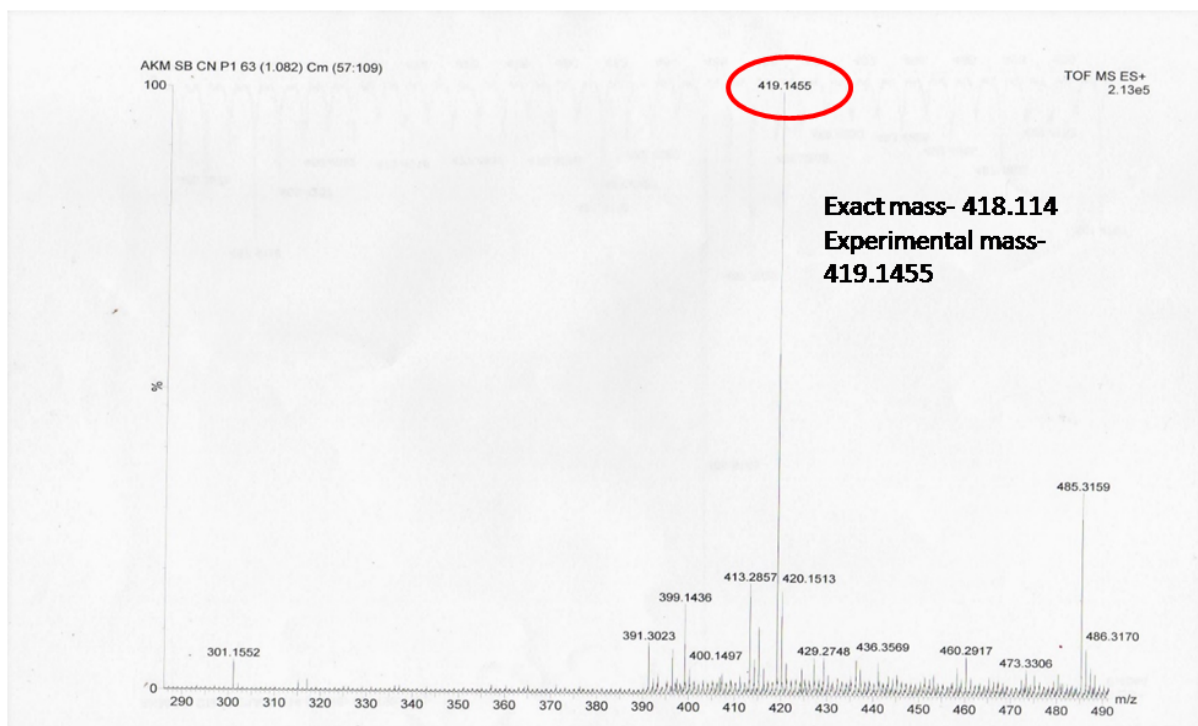

Figure S15: ESI-MS of probe MNBTZ [M+H]

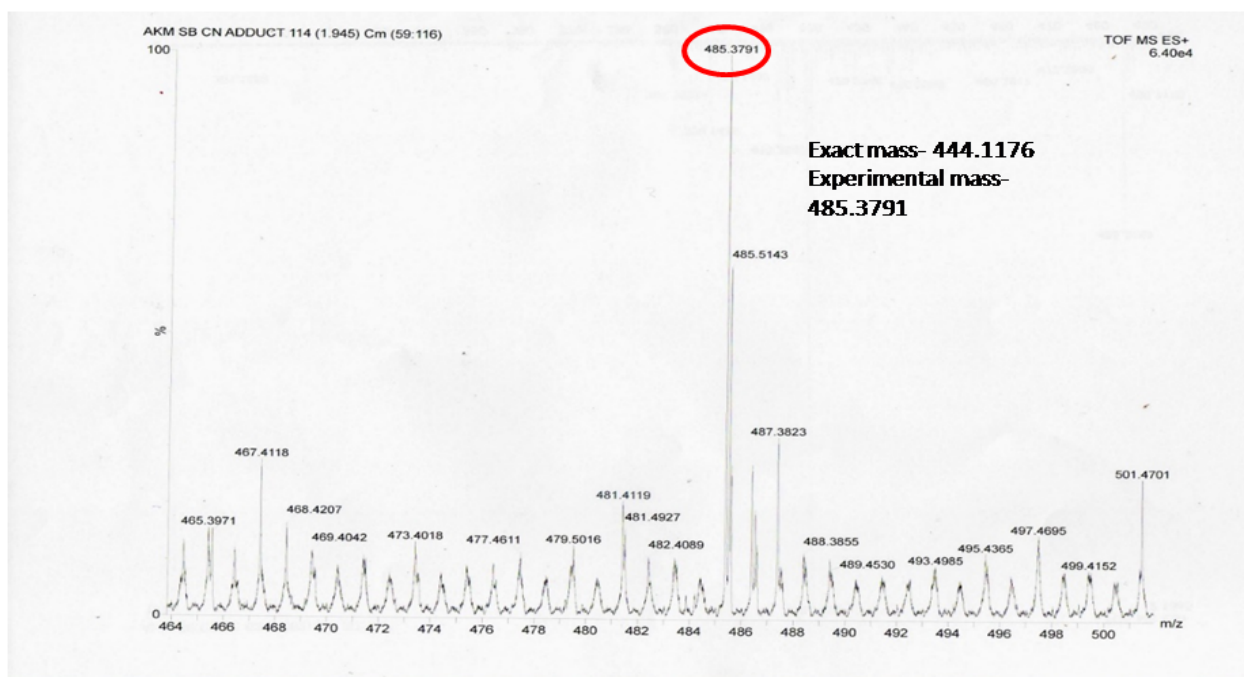

Figure S16: ESI-MS of product MNBTZ-CN [M+Na+H<sub>2</sub>O]
